# Supplementary material for: Validation of a Single RGB-D Camera for Gait Assessment of Polyneuropathy Patients
Source: PubMed Central journal article supplement (PMC6891607; doi:10.3390/s19224929), 2019-11-12
Supplement: sensors-19-04929-s001.pdf [file sensors-19-04929-s001.pdf]

# **Validation of a Single RGB-D Camera for Gait Assessment of Polyneuropathy Patients**

Maria do Carmo Vilas-Boas\*, Ana Patrícia Rocha, Hugo Miguel Pereira Choupina, Márcio Neves Cardoso, José Maria Fernandes, Teresa Coelho, João Paulo Silva Cunha

## **Supplementary Data**

\*jpcunha@fe.up.pt

# **Gait cycle detection**

Window size choice

**Table S1. Results obtained when filtering the ankle distance measure using a moving average filter with a window of size NF1, and estimating the heel strike instants using a window of size ND1 (Kinect data), for different window sizes. The results corresponding to the chosen window size pair are underlined.**

| NF1 | ND1 | Precision (%) | Sensitivity (%) | Absolute Error (ms) |
|-----|-----|---------------|-----------------|---------------------|
| 1   | 3   | 50.9          | 96.0            | 51.3 ± 35.1         |
| 1   | 5   | 89.8          | 69.8            | 61.6 ± 40.4         |
| 1   | 7   | 95.1          | 48.6            | 61.0 ± 40.2         |
| 1   | 9   | 96.0          | 42.0            | 58.6 ± 37.4         |
| 3   | 3   | 81.9          | 94.4            | 48.2 ± 35.4         |
| 3   | 5   | 93.6          | 89.8            | 51.6 ± 37.8         |
| 3   | 7   | 95.9          | 86.0            | 50.7 ± 36.7         |
| 3   | 9   | 97.4          | 82.0            | 50.3 ± 36.7         |
| 5   | 3   | 90.8          | 95.4            | 42.9 ± 38.7         |
| 5   | 5   | 96.7          | 91.6            | 41.6 ± 36.3         |
| 5   | 7   | 97.8          | 91.0            | 41.2 ± 35.9         |
| 5   | 9   | 97.9          | 90.0            | 41.1 ± 35.8         |
| 7   | 3   | 93.6          | 95.1            | 40.2 ± 38.2         |
| 7   | 5   | 96.7          | 94.1            | 39.9 ± 37.6         |
| 7   | 7   | <u>98.4</u>   | <u>91.9</u>     | <u>37.8 ± 33.7</u>  |
| 7   | 9   | 98.4          | 91.5            | 37.9 ± 33.8         |
| 9   | 3   | 94.4          | 94.4            | 39.1 ± 33.9         |
| 9   | 5   | 96.9          | 93.1            | 39.2 ± 33.9         |
| 9   | 7   | 97.5          | 92.5            | 38.7 ± 33.0         |
| 9   | 9   | 98.4          | 91.3            | 37.7 ± 30.9         |

**Table S2. Results obtained when filtering the ankle velocity measures using a moving average filter with a window of size NF2, and identifying the side of the heel strikes using a window of size ND2 (Kinect data), for different window sizes. The results corresponding to the chosen window size pair are underlined.**

| NF2       | ND2      | Precision (%) |            |            | Sensitivity (%) |            |            | Mean (Precision & Sensitivity) (%) |
|-----------|----------|---------------|------------|------------|-----------------|------------|------------|------------------------------------|
|           |          | Left          | Right      | Mean       | Left            | Right      | Mean       |                                    |
| <b>1</b>  | <b>3</b> | 76.4          | 73.9       | 75.1       | 73.6            | 77.3       | 75.4       | 75.3                               |
| <b>1</b>  | <b>5</b> | 84.4          | 87.2       | 85.8       | 87.8            | 84.4       | 86.1       | 86.0                               |
| <b>1</b>  | <b>7</b> | 95.1          | 94.6       | 94.8       | 94.5            | 95.2       | 94.8       | 94.8                               |
| <b>1</b>  | <b>9</b> | 97.4          | 97.1       | 97.3       | 97.1            | 97.4       | 97.3       | 97.3                               |
| <b>3</b>  | <b>3</b> | 86.7          | 86.0       | 86.3       | 85.8            | 87.1       | 86.5       | 86.4                               |
| <b>3</b>  | <b>5</b> | 95.7          | 94.6       | 95.2       | 94.8            | 95.8       | 95.3       | 95.2                               |
| <b>3</b>  | <b>7</b> | 98.4          | 98.1       | 98.2       | 98.0            | 98.4       | 98.2       | 98.2                               |
| <b>3</b>  | <b>9</b> | 99.0          | 98.4       | 98.7       | 98.4            | 99.0       | 98.7       | 98.7                               |
| <b>5</b>  | <b>3</b> | 94.3          | 97.0       | 95.7       | 97.1            | 94.2       | 95.6       | 95.7                               |
| <b>5</b>  | <b>5</b> | 98.0          | 97.4       | 97.7       | 97.7            | 98.1       | 97.9       | 97.8                               |
| <b>5</b>  | <b>7</b> | 98.4          | 98.7       | 98.5       | 98.7            | 98.4       | 98.5       | 98.5                               |
| <b>5</b>  | <b>9</b> | 99.0          | 100        | 99.5       | 100             | 99.0       | 99.5       | 99.5                               |
| <b>7</b>  | <b>3</b> | 98.0          | 97.5       | 97.7       | 97.4            | 98.1       | 97.7       | 97.7                               |
| <b>7</b>  | <b>5</b> | 98.7          | 99.0       | 98.9       | 99.0            | 98.7       | 98.9       | 98.9                               |
| <b>7</b>  | <b>7</b> | 99.3          | 99.4       | 99.4       | 99.3            | 99.4       | 99.4       | 99.4                               |
| <b>7</b>  | <b>9</b> | 99.4          | 99.7       | 99.5       | 99.7            | 99.4       | 99.5       | 99.5                               |
| <b>9</b>  | <b>3</b> | 99.0          | 99.4       | 99.2       | 99.3            | 99.0       | 99.2       | 99.2                               |
| <b>9</b>  | <b>5</b> | 99.7          | 99.7       | 99.7       | 99.7            | 99.7       | 99.7       | 99.7                               |
| <b>9</b>  | <b>7</b> | 99.7          | 99.7       | 99.7       | 99.7            | 99.7       | 99.7       | 99.7                               |
| <b>9</b>  | <b>9</b> | 99.3          | 99.4       | 99.4       | 99.3            | 99.4       | 99.4       | 99.4                               |
| <b>11</b> | <b>3</b> | 99.3          | 99.4       | 99.4       | 99.3            | 99.4       | 99.4       | 99.4                               |
| <b>11</b> | <b>5</b> | 99.4          | 99.7       | 99.5       | 99.7            | 99.4       | 99.5       | 99.5                               |
| <b>11</b> | <b>7</b> | 99.4          | 99.7       | 99.5       | 99.7            | 99.4       | 99.5       | 99.5                               |
| <b>11</b> | <b>9</b> | 99.4          | 100        | 99.7       | 100             | 99.4       | 99.7       | 99.7                               |
| <b>13</b> | <b>3</b> | 99.4          | 99.7       | 99.5       | 99.7            | 99.4       | 99.5       | 99.5                               |
| <b>13</b> | <b>5</b> | 99.7          | 99.7       | 99.7       | 99.7            | 99.7       | 99.7       | 99.7                               |
| <b>13</b> | <b>7</b> | 99.7          | 100        | 99.8       | 100             | 99.7       | 99.8       | 99.8                               |
| <b>13</b> | <b>9</b> | <u>100</u>    | <u>100</u> | <u>100</u> | <u>100</u>      | <u>100</u> | <u>100</u> | <u>100</u>                         |
| <b>15</b> | <b>3</b> | 99.4          | 99.7       | 99.5       | 99.7            | 99.4       | 99.5       | 99.5                               |
| <b>15</b> | <b>5</b> | 99.7          | 99.7       | 99.7       | 99.7            | 99.7       | 99.7       | 99.7                               |
| <b>15</b> | <b>7</b> | 99.7          | 100        | 99.8       | 100             | 99.7       | 99.8       | 99.8                               |
| <b>15</b> | <b>9</b> | 100           | 100        | 100        | 100             | 100        | 100        | 100                                |

**Table S3. Results obtained when filtering the shank angle measures using a moving average filter with a window of size NF3 (Kinect data), for different window sizes. The results corresponding to the chosen window size are underlined.**

| NF3       | Sensitivity (%) | Absolute Error (ms) |                    |                         |                         |
|-----------|-----------------|---------------------|--------------------|-------------------------|-------------------------|
|           |                 | Stance duration     | Swing duration     | Single support duration | Double support duration |
| <b>1</b>  | 98.5            | 63.7 ± 53.8         | 63.7 ± 52.2        | 108.9 ± 74.8            | 108.6 ± 85.6            |
| <b>3</b>  | 98.1            | 58.5 ± 50.9         | 60.0 ± 50.1        | 103.0 ± 70.9            | 102.0 ± 79.4            |
| <b>5</b>  | 98.1            | 58.3 ± 50.6         | 59.9 ± 49.0        | 103.0 ± 69.7            | 102.1 ± 78.0            |
| <b>7</b>  | 97.9            | 56.3 ± 49.2         | 57.6 ± 45.9        | 101.1 ± 65.8            | 99.9 ± 77.2             |
| <b>9</b>  | <u>98.1</u>     | <u>56.8 ± 49.6</u>  | <u>58.1 ± 45.8</u> | <u>101.0 ± 66.0</u>     | <u>100.0 ± 78.7</u>     |
| <b>11</b> | 98.1            | 60.5 ± 49.1         | 61.5 ± 46.3        | 111.5 ± 66.5            | 109.6 ± 78.5            |

# **Gait parameter computation**

Butterworth filter parameter choice (Kinect)

**Table S4. Butterworth filter’s order and cut-off frequency values used for computing gait parameters from Kinect data.**

| <b>Gait parameter</b>                    | <b>Order</b> | <b>Cut-off frequency (Hz)</b> |
|------------------------------------------|--------------|-------------------------------|
| <b>Stride length</b>                     |              |                               |
| <b>Step length</b>                       |              | Not filtered                  |
| <b>Step width</b>                        |              |                               |
| <b>Gait speed</b>                        |              |                               |
| <b>Gait speed variability</b>            | 6            | 4                             |
| <b>Foot swing velocity</b>               |              |                               |
| <b>Arm swing velocity</b>                |              | 3                             |
| <b>TBCM<sup>a</sup> sway x-component</b> | 2            | 1                             |
| <b>TBCM<sup>a</sup> sway y-component</b> |              | Not filtered                  |
| <b>Spine shoulder angle</b>              |              | Not filtered                  |
| <b>Spine middle angle</b>                |              |                               |
| <b>Elbow angle maximum</b>               | 2            | 1                             |
| <b>Elbow angle minimum</b>               |              | Not filtered                  |
| <b>Knee angle maximum</b>                | 6            | 3                             |
| <b>Knee angle minimum</b>                |              | Not filtered                  |
| <b>Hip angle range</b>                   | 6            | 3                             |
| <b>Ankle angle range</b>                 |              | 1                             |

<sup>a</sup>TBCM stands for total body center of mass.

**Table S5. Mean absolute error between Kinect and Qualisys for the spatiotemporal gait parameters, without filtering and when varying the Butterworth filter's order between 2 and 6 (even integer values), and cut-off frequency between 1 and 9 Hz (integer values). The result corresponding to the chosen value pair for each gait parameter is underlined.**

| Order | Cut-off frequency (Hz) | Stride length (cm) | Step length (cm) | Step width (cm) | Gait speed (m/s) | Gait speed variability (m/s) | Foot swing velocity (m/s) | Arm swing velocity (m/s) | Total body center of mass sway (mm <sup>2</sup> ) |              |
|-------|------------------------|--------------------|------------------|-----------------|------------------|------------------------------|---------------------------|--------------------------|---------------------------------------------------|--------------|
|       |                        |                    |                  |                 |                  |                              |                           |                          | x-component                                       | y-component  |
|       | <b>No filter</b>       | <u>1.53</u>        | <u>2.78</u>      | <u>1.02</u>     | 0.014            | 0.073                        | 0.983                     | 0.285                    | 0.219                                             | <u>0.044</u> |
| 2     | <b>1</b>               | 1.53               | 3.37             | 10.70           | 0.019            | 0.037                        | 0.628                     | 0.219                    | <u>0.179</u>                                      | 0.099        |
| 2     | <b>2</b>               | 1.53               | 2.88             | 5.49            | 0.015            | 0.015                        | 0.339                     | 0.125                    | 0.200                                             | 0.069        |
| 2     | <b>3</b>               | 1.53               | 2.72             | 3.31            | 0.014            | 0.011                        | 0.247                     | 0.104                    | 0.209                                             | 0.057        |
| 2     | <b>4</b>               | 1.53               | 2.71             | 2.22            | 0.014            | 0.011                        | 0.260                     | 0.105                    | 0.214                                             | 0.052        |
| 2     | <b>5</b>               | 1.53               | 2.70             | 1.61            | 0.014            | 0.014                        | 0.330                     | 0.116                    | 0.216                                             | 0.049        |
| 2     | <b>6</b>               | 1.53               | 2.70             | 1.28            | 0.014            | 0.021                        | 0.421                     | 0.135                    | 0.217                                             | 0.047        |
| 2     | <b>7</b>               | 1.53               | 2.67             | 1.10            | 0.014            | 0.031                        | 0.530                     | 0.162                    | 0.218                                             | 0.046        |
| 2     | <b>8</b>               | 1.53               | 2.69             | 1.02            | 0.014            | 0.044                        | 0.662                     | 0.196                    | 0.219                                             | 0.045        |
| 2     | <b>9</b>               | 1.53               | 2.74             | 1.00            | 0.014            | 0.060                        | 0.832                     | 0.242                    | 0.219                                             | 0.044        |
| 4     | <b>1</b>               | 1.53               | 4.89             | 12.6            | 0.016            | 0.045                        | 0.697                     | 0.219                    | 0.195                                             | 0.107        |
| 4     | <b>2</b>               | 1.53               | 3.17             | 5.54            | 0.013            | 0.013                        | 0.369                     | 0.107                    | 0.213                                             | 0.064        |
| 4     | <b>3</b>               | 1.53               | 2.88             | 2.82            | 0.013            | 0.011                        | 0.237                     | 0.094                    | 0.217                                             | 0.051        |
| 4     | <b>4</b>               | 1.53               | 2.72             | 1.78            | 0.013            | 0.011                        | 0.223                     | 0.098                    | 0.218                                             | 0.047        |
| 4     | <b>5</b>               | 1.53               | 2.77             | 1.33            | 0.013            | 0.012                        | 0.263                     | 0.106                    | 0.218                                             | 0.046        |
| 4     | <b>6</b>               | 1.53               | 2.70             | 1.12            | 0.014            | 0.013                        | 0.325                     | 0.119                    | 0.218                                             | 0.045        |
| 4     | <b>7</b>               | 1.53               | 2.66             | 1.04            | 0.014            | 0.017                        | 0.405                     | 0.135                    | 0.219                                             | 0.045        |
| 4     | <b>8</b>               | 1.53               | 2.69             | 1.00            | 0.014            | 0.027                        | 0.494                     | 0.157                    | 0.219                                             | 0.045        |
| 4     | <b>9</b>               | 1.53               | 2.76             | 0.99            | 0.014            | 0.041                        | 0.596                     | 0.183                    | 0.219                                             | 0.045        |
| 6     | <b>1</b>               | 1.53               | 6.91             | 13.49           | 0.016            | 0.051                        | 0.693                     | 0.218                    | 0.200                                             | 0.111        |
| 6     | <b>2</b>               | 1.53               | 3.36             | 5.75            | 0.013            | 0.013                        | 0.387                     | 0.103                    | 0.215                                             | 0.061        |
| 6     | <b>3</b>               | 1.53               | 3.00             | 2.71            | 0.013            | 0.011                        | 0.233                     | <u>0.091</u>             | 0.217                                             | 0.049        |
| 6     | <b>4</b>               | 1.53               | 2.75             | 1.68            | <u>0.013</u>     | <u>0.011</u>                 | <u>0.215</u>              | 0.096                    | 0.218                                             | 0.046        |
| 6     | <b>5</b>               | 1.53               | 2.72             | 1.29            | 0.013            | 0.012                        | 0.248                     | 0.104                    | 0.218                                             | 0.046        |
| 6     | <b>6</b>               | 1.53               | 2.75             | 1.11            | 0.014            | 0.012                        | 0.299                     | 0.115                    | 0.218                                             | 0.045        |
| 6     | <b>7</b>               | 1.53               | 2.68             | 1.03            | 0.014            | 0.014                        | 0.368                     | 0.129                    | 0.219                                             | 0.045        |
| 6     | <b>8</b>               | 1.53               | 2.71             | 1.00            | 0.014            | 0.021                        | 0.450                     | 0.148                    | 0.219                                             | 0.045        |
| 6     | <b>9</b>               | 1.53               | 2.71             | 0.99            | 0.014            | 0.034                        | 0.539                     | 0.172                    | 0.219                                             | 0.045        |



**Table S6. Mean absolute error between Kinect and Qualisys for the kinematic gait parameters, without filtering and when varying the Butterworth filter's order between 2 and 6 (even integer values), and cut-off frequency between 1 and 9 Hz (integer values). The result corresponding to the chosen value pair for each gait parameter is underlined.**

| Order    | Cut-off frequency (Hz) | Mean angle (deg.) |              | Elbow angle (deg.) |             | Knee angle (deg.) |             | Angle range (deg.) |              |
|----------|------------------------|-------------------|--------------|--------------------|-------------|-------------------|-------------|--------------------|--------------|
|          |                        | Spine shoulder    | Spine middle | Maximum            | Minimum     | Maximum           | Minimum     | Hip                | Ankle        |
|          | <b>No filter</b>       | <u>4.08</u>       | <u>14.69</u> | 5.74               | <u>5.67</u> | 5.04              | <u>7.54</u> | 5.45               | 41.22        |
| <b>2</b> | <b>1</b>               | 4.08              | 14.69        | <u>5.03</u>        | 7.71        | 5.14              | 19.79       | 7.62               | 12.62        |
| <b>2</b> | <b>2</b>               | 4.08              | 14.69        | 5.04               | 6.66        | 4.79              | 12.72       | 4.53               | 20.21        |
| <b>2</b> | <b>3</b>               | 4.08              | 14.69        | 5.06               | 6.33        | 4.81              | 10.32       | 4.25               | 25.38        |
| <b>2</b> | <b>4</b>               | 4.08              | 14.69        | 5.09               | 6.16        | 4.85              | 9.32        | 4.50               | 29.27        |
| <b>2</b> | <b>5</b>               | 4.08              | 14.69        | 5.15               | 6.05        | 4.88              | 8.81        | 4.74               | 32.63        |
| <b>2</b> | <b>6</b>               | 4.08              | 14.69        | 5.21               | 5.97        | 4.92              | 8.47        | 4.95               | 35.66        |
| <b>2</b> | <b>7</b>               | 4.08              | 14.69        | 5.28               | 5.90        | 4.95              | 8.22        | 5.12               | 38.37        |
| <b>2</b> | <b>8</b>               | 4.08              | 14.69        | 5.37               | 5.82        | 4.99              | 7.99        | 5.26               | 40.82        |
| <b>2</b> | <b>9</b>               | 4.08              | 14.69        | 5.53               | 5.72        | 5.04              | 7.74        | 5.39               | 42.77        |
| <b>4</b> | <b>1</b>               | 4.08              | 14.69        | 5.11               | 7.83        | 5.10              | 22.35       | 9.88               | 11.84        |
| <b>4</b> | <b>2</b>               | 4.07              | 14.69        | 5.08               | 6.55        | 4.81              | 11.68       | 4.76               | 19.57        |
| <b>4</b> | <b>3</b>               | 4.08              | 14.69        | 5.06               | 6.26        | 4.79              | 8.83        | 4.23               | 25.01        |
| <b>4</b> | <b>4</b>               | 4.08              | 14.69        | 5.08               | 6.15        | 4.82              | 8.43        | 4.62               | 29.08        |
| <b>4</b> | <b>5</b>               | 4.08              | 14.69        | 5.11               | 6.07        | 4.87              | 8.41        | 4.87               | 32.21        |
| <b>4</b> | <b>6</b>               | 4.08              | 14.69        | 5.16               | 6.02        | 4.91              | 8.35        | 5.02               | 34.92        |
| <b>4</b> | <b>7</b>               | 4.08              | 14.69        | 5.22               | 5.97        | 4.94              | 8.26        | 5.11               | 37.53        |
| <b>4</b> | <b>8</b>               | 4.08              | 14.69        | 5.29               | 5.92        | 4.96              | 8.14        | 5.19               | 39.97        |
| <b>4</b> | <b>9</b>               | 4.08              | 14.69        | 5.35               | 5.85        | 4.99              | 8.00        | 5.28               | 41.77        |
| <b>6</b> | <b>1</b>               | 4.08              | 14.69        | 5.15               | 7.93        | 5.13              | 23.83       | 10.86              | <u>11.45</u> |
| <b>6</b> | <b>2</b>               | 4.07              | 14.69        | 5.11               | 6.50        | 4.87              | 11.59       | 4.91               | 19.36        |
| <b>6</b> | <b>3</b>               | 4.08              | 14.69        | 5.06               | 6.25        | <u>4.78</u>       | 8.23        | <u>4.22</u>        | 24.64        |
| <b>6</b> | <b>4</b>               | 4.08              | 14.69        | 5.07               | 6.14        | 4.80              | 8.16        | 4.66               | 29.00        |
| <b>6</b> | <b>5</b>               | 4.08              | 14.69        | 5.11               | 6.07        | 4.86              | 8.40        | 4.91               | 32.35        |
| <b>6</b> | <b>6</b>               | 4.08              | 14.69        | 5.14               | 6.03        | 4.91              | 8.39        | 5.03               | 34.87        |
| <b>6</b> | <b>7</b>               | 4.08              | 14.69        | 5.19               | 5.99        | 4.94              | 8.29        | 5.11               | 37.26        |
| <b>6</b> | <b>8</b>               | 4.08              | 14.69        | 5.26               | 5.94        | 4.97              | 8.19        | 5.17               | 39.68        |
| <b>6</b> | <b>9</b>               | 4.08              | 14.69        | 5.33               | 5.89        | 4.97              | 8.06        | 5.24               | 41.63        |
